# Supplementary figures and images for: Physiological protein blocks direct the Mre11–Rad50–Xrs2 and Sae2 nuclease complex to initiate DNA end resection
Source: PubMed Central journal article supplement — Genes Dev. 2017 Dec 1;31(23-24):2325–30. doi: 10.1101/gad.308254.117 (PMC5795779; doi:10.1101/gad.308254.117), 2017-12-01

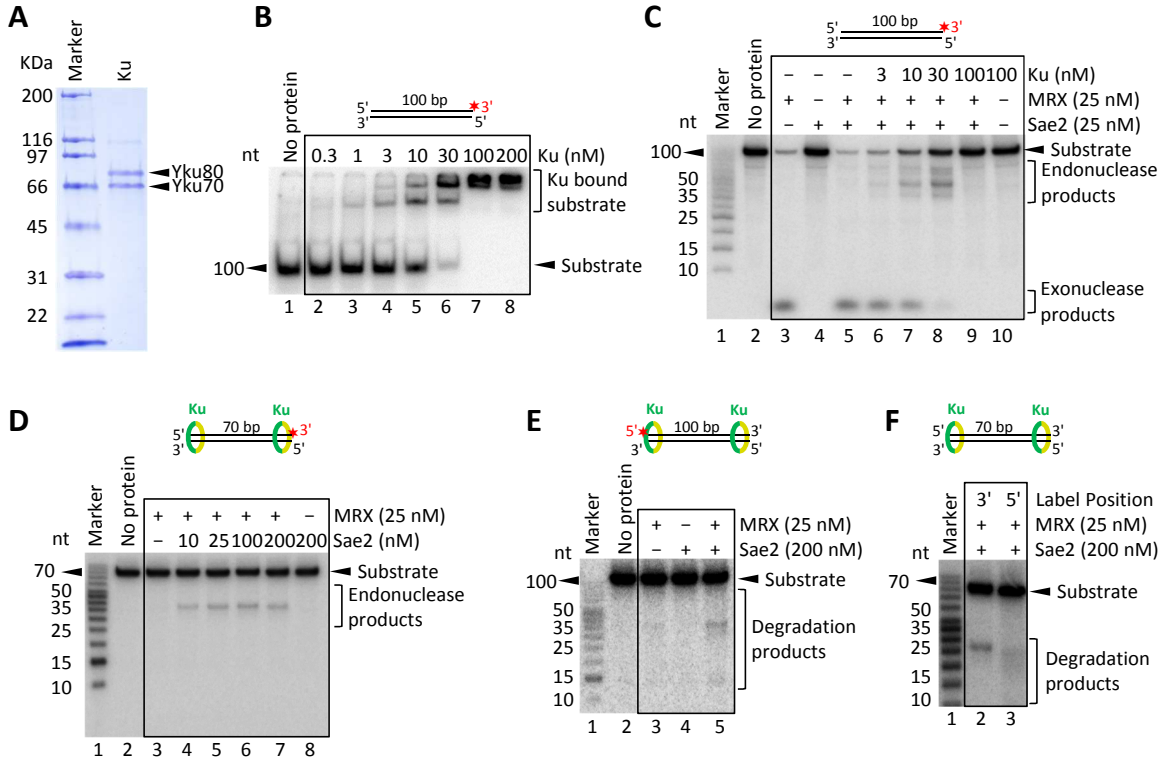

**A**

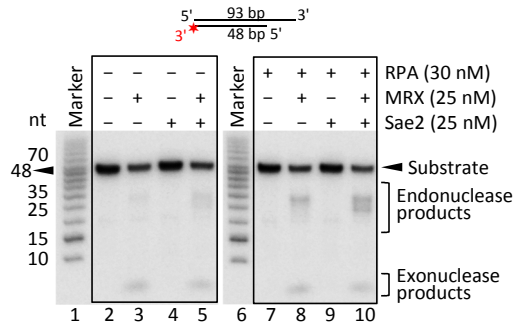

**B**

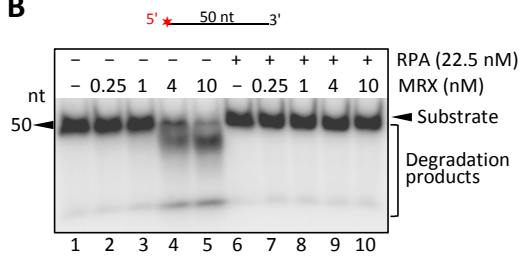

**C**

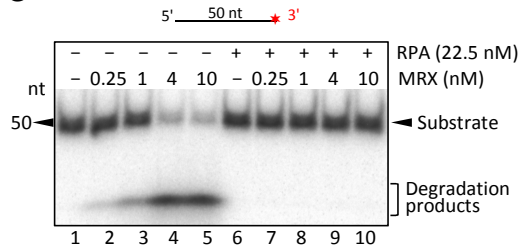

Supplement: supp_gad.308254.117_Supplemental_Figs_308254.pdf [file supp_gad.308254.117_Supplemental_Figs_308254.pdf]
